# Supplementary material for: Structural and mutational analysis of the ribosome-arresting human XBP1u
Source: eLife. 2019 Jun 27;8:e46267. doi: 10.7554/eLife.46267 (PMC6624018; doi:10.7554/eLife.46267)
Supplement: Figure 6—source data 1. [file elife-46267-fig6-data1.xls]

## Sheet: Fig 6B
	fFL values for Fig. 6B
		LepB-XBP1u (S255A)				LepB-XBP1u (S255A, P254C)
	L	fFL	SEM		L	fFL	SEM
	25	0.194652	0.0190511		25	0.0496265	0.0248935
	29	0.3311	0.0230122		30	0.104954	0.0180206
	30	0.343353	0.0355304		31	0.0886233	0.00356257
	31	0.303852	0.0196598		33	0.135576	0.028917
	33	0.363538	0.00907228		34	0.127313	0.0155059
	34	0.358287	0.0283284		36	0.19841	0.0149761
	36	0.449434	0.0218682		38	0.293231	0.0129154
	38	0.554223	0.0193179		39	0.370489	0.00434621
	39	0.619538	0.041734		41	0.241437	0.0019637
	41	0.734829	0.0411539		43	0.26501	0.0465065
	43	0.89242	0.0220928		44	0.252173	0.0751052
	44	0.689934	0.00917562		45	0.171268	0.0018805
	45	0.523794	0.0393061		46	0.153882	0.00206592
	46	0.470612	0.00605885		48	0.0851484	0.0132515
	48	0.395146	0.0518511
	51	0.327536	0.052986
	53	0.229251	0.0228304
	56	0.195753	0.0184533
	59	0.159978	0.0304418
	61	0.108885	0.0227843
	63	0.171137	0.043883
	69	0.249164	0.0691456
	71	0.197813	0.0860765

## Sheet: Fig 6C
	fFL values for Fig. 6C
		Position	Mutation
	AP		A	R	N	D	C	Q	E	H	I	L	K	M	F	P	S	T	W	Y	V	G
	G	262	0.829902	0.787029	0.823162	0.798051	1	1	1	1	1	1	0.802679	1	1	1	1	0.798547	1	0.830102	1	0.89242
	N	261	0.826624	1	0.89242	0.7053	1	0.799367	1	0.776067	0.835991	0.695052	0.809299	0.81964	0.804187	0.766094	0.828956	0.810633	0.826921	0.82348	0.814271	1
	M	260	1	1	1	1	1	1	1	1	1	1	1	0.89242	0.779402	0.809897	1	1	1	1	1	0.764911
	L	259	1	0.824935	1	1	1	1	1	1	0.819739	0.89242	0.734762	1	1	0.863601	1	1	1	1	0.85436	1
	P	258	1	1	1	1	1	1	1	1	1	1	1	1	1	0.89242	1	1	1	1	1	1
	K	257	1	0.838326	1	1	1	1	1	0.748364	1	1	0.89242	1	1	1	1	0.876654	1	1	1	1
	W	256	1	1	1	1	1	1	1	1	1	1	1	1	1	1	1	1	0.89242	1	1	1
	A	255	0.89242	1	1	1	1	1	1	1	1	1	1	1	1	1	1	1	1	1	1	1
	P	254	1	0.611352	0.649549	1	0.26501	0.751889	0.835731	1	0.40442	1	1	1	1	0.89242	0.715485	0.690953	1	1	0.457355	1
	Q	253	1	1	0.40412	1	1	0.89242	1	1	1	1	1	1	1	1	1	1	1	1	1	1
	H	252	1	1	1	1	1	1	1	0.89242	1	1	1	1	1	1	1	1	1	1	1	1
	R	251	1	0.89242	1	1	1	1	1	1	1	1	1	1	1	1	1	1	1	1	1	1
	G	250	1	1	1	1	1	1	1	1	1	1	1	1	1	1	1	1	1	1	1	0.89242
	W	249	1	1	1	1	1	1	1	1	1	1	1	1	1	1	1	1	0.89242	1	1	1
	Q	248	1	0.722113	1	1	1	0.89242	1	1	0.84302	0.804148	1	0.825542	0.730397	1	1	1	1	0.809566	1	1
	C	247	1	1	0.436367	0.53694	0.89242	0.661276	0.623556	0.516778	1	0.710853	0.44251	1	1	1	0.742661	1	1	1	1	1
	L	246	1	1	1	1	1	1	1	1	0.756492	0.89242	1	1	1	1	1	1	1	1	1	1
	F	245	1	0.802985	1	1	1	1	1	0.83667	1	1	1	1	0.89242	0.61676	1	1	0.729336	1	1	1
	P	244	1	1	1	1	1	1	1	1	1	1	1	1	1	0.89242	1	1	1	1	1	1
	P	243	0.770502	1	1	0.621778	1	1	1	0.835708	1	1	1	1	1	0.89242	0.809211	1	1	1	1	1
	Q	242	1	1	1	0.757006	1	0.89242	1	1	0.673123	1	1	0.783637	1	1	0.814531	0.76713	0.571989	0.554202	0.774958	0.779264
	Y	241	1	1	1	1	1	1	1	1	1	1	1	1	1	1	1	1	1	0.89242	1	1

## Sheet: Fig 6D
	fFL values for Fig. 6D
		Position	Mutation
	AP		A	R	N	D	C	Q	E	H	I	L	K	M	F	P	S	T	W	Y	V	G
	G	262																				0.457355
	N	261			0.457355
	M	260												0.457355
	L	259										0.457355
	P	258	1	1	0.9	0.81	1	0.94	0.67	1	0.89	0.94	0.83	0.59	0.72	0.457355	0.79	1	0.5	1	1	1
	K	257											0.457355
	W	256	1	1	0.82	0.77	0.8	0.7	0.68	1	1	1	0.91	0.74	1	0.6	0.7	0.88	0.457355	1	0.9	1
	A	255	0.457355	1	1	1	1	1	1	1	1	1	1	1	1	1	1	1	1	1	1	1
	V	254																			0.457355
	Q	253	1	1	0.375581	0.424384	0.30681	0.457355	0.665295	1	1	0.316027	1	1	1	1	1	1	0.887814	0.7	1	1
	H	252	1	0.7	0.8	0.7	0.83	1	1	0.457355	1	0.8	0.79	0.626022	0.63	0.6	1	1	0.77	0.66	1	0.8
	R	251	1	0.457355	0.89	1	0.6	1	1	1	0.8	0.7	0.86	0.8	0.5	0.61	1	1	0.6	0.65	1	0.8
	G	250	0.67	0.9	0.89	0.85	0.7	0.67	0.94	0.88	0.96	0.52	0.93	0.7	0.54	0.66	0.94	0.56	0.6	0.69	0.71	0.457355
	W	249	1	1	0.75	0.7	0.7	0.65	0.9	0.93	1	1	0.94	0.64	0.552015	1	1	1	0.457355	0.4	0.65	0.65
	Q	248						0.457355
	C	247					0.457355
	L	246	0.91	0.564333	0.8	0.74	0.612202	0.501389	0.76954	0.826745	0.345031	0.457355	0.85577	0.4354	0.636934	0.73	0.768727	0.769408	0.653329	0.613285	0.57	0.730529
	F	245													0.457355
	P	244	0.609675	0.8	0.9	0.7	0.755631	0.89	0.6	0.62	0.9	0.97	0.675613	0.53	0.747316	0.457355	0.81	1	0.66	0.684176	0.56	1
	P	243														0.457355
	Q	242						0.457355
	Y	241	0.65	1	0.761004	0.740805	0.83	0.61	0.64	0.715072	1	0.778003	0.61025	0.6	0.8	0.7	0.72	0.9	0.7	0.457355	1	1
