# Supplementary figures and images for: Structural and mutational analysis of the ribosome-arresting human XBP1u
Source: eLife journal article supplement (doi:10.7554/elife.46267), 2019-06-27

**Figure 2 supplement 1**

**
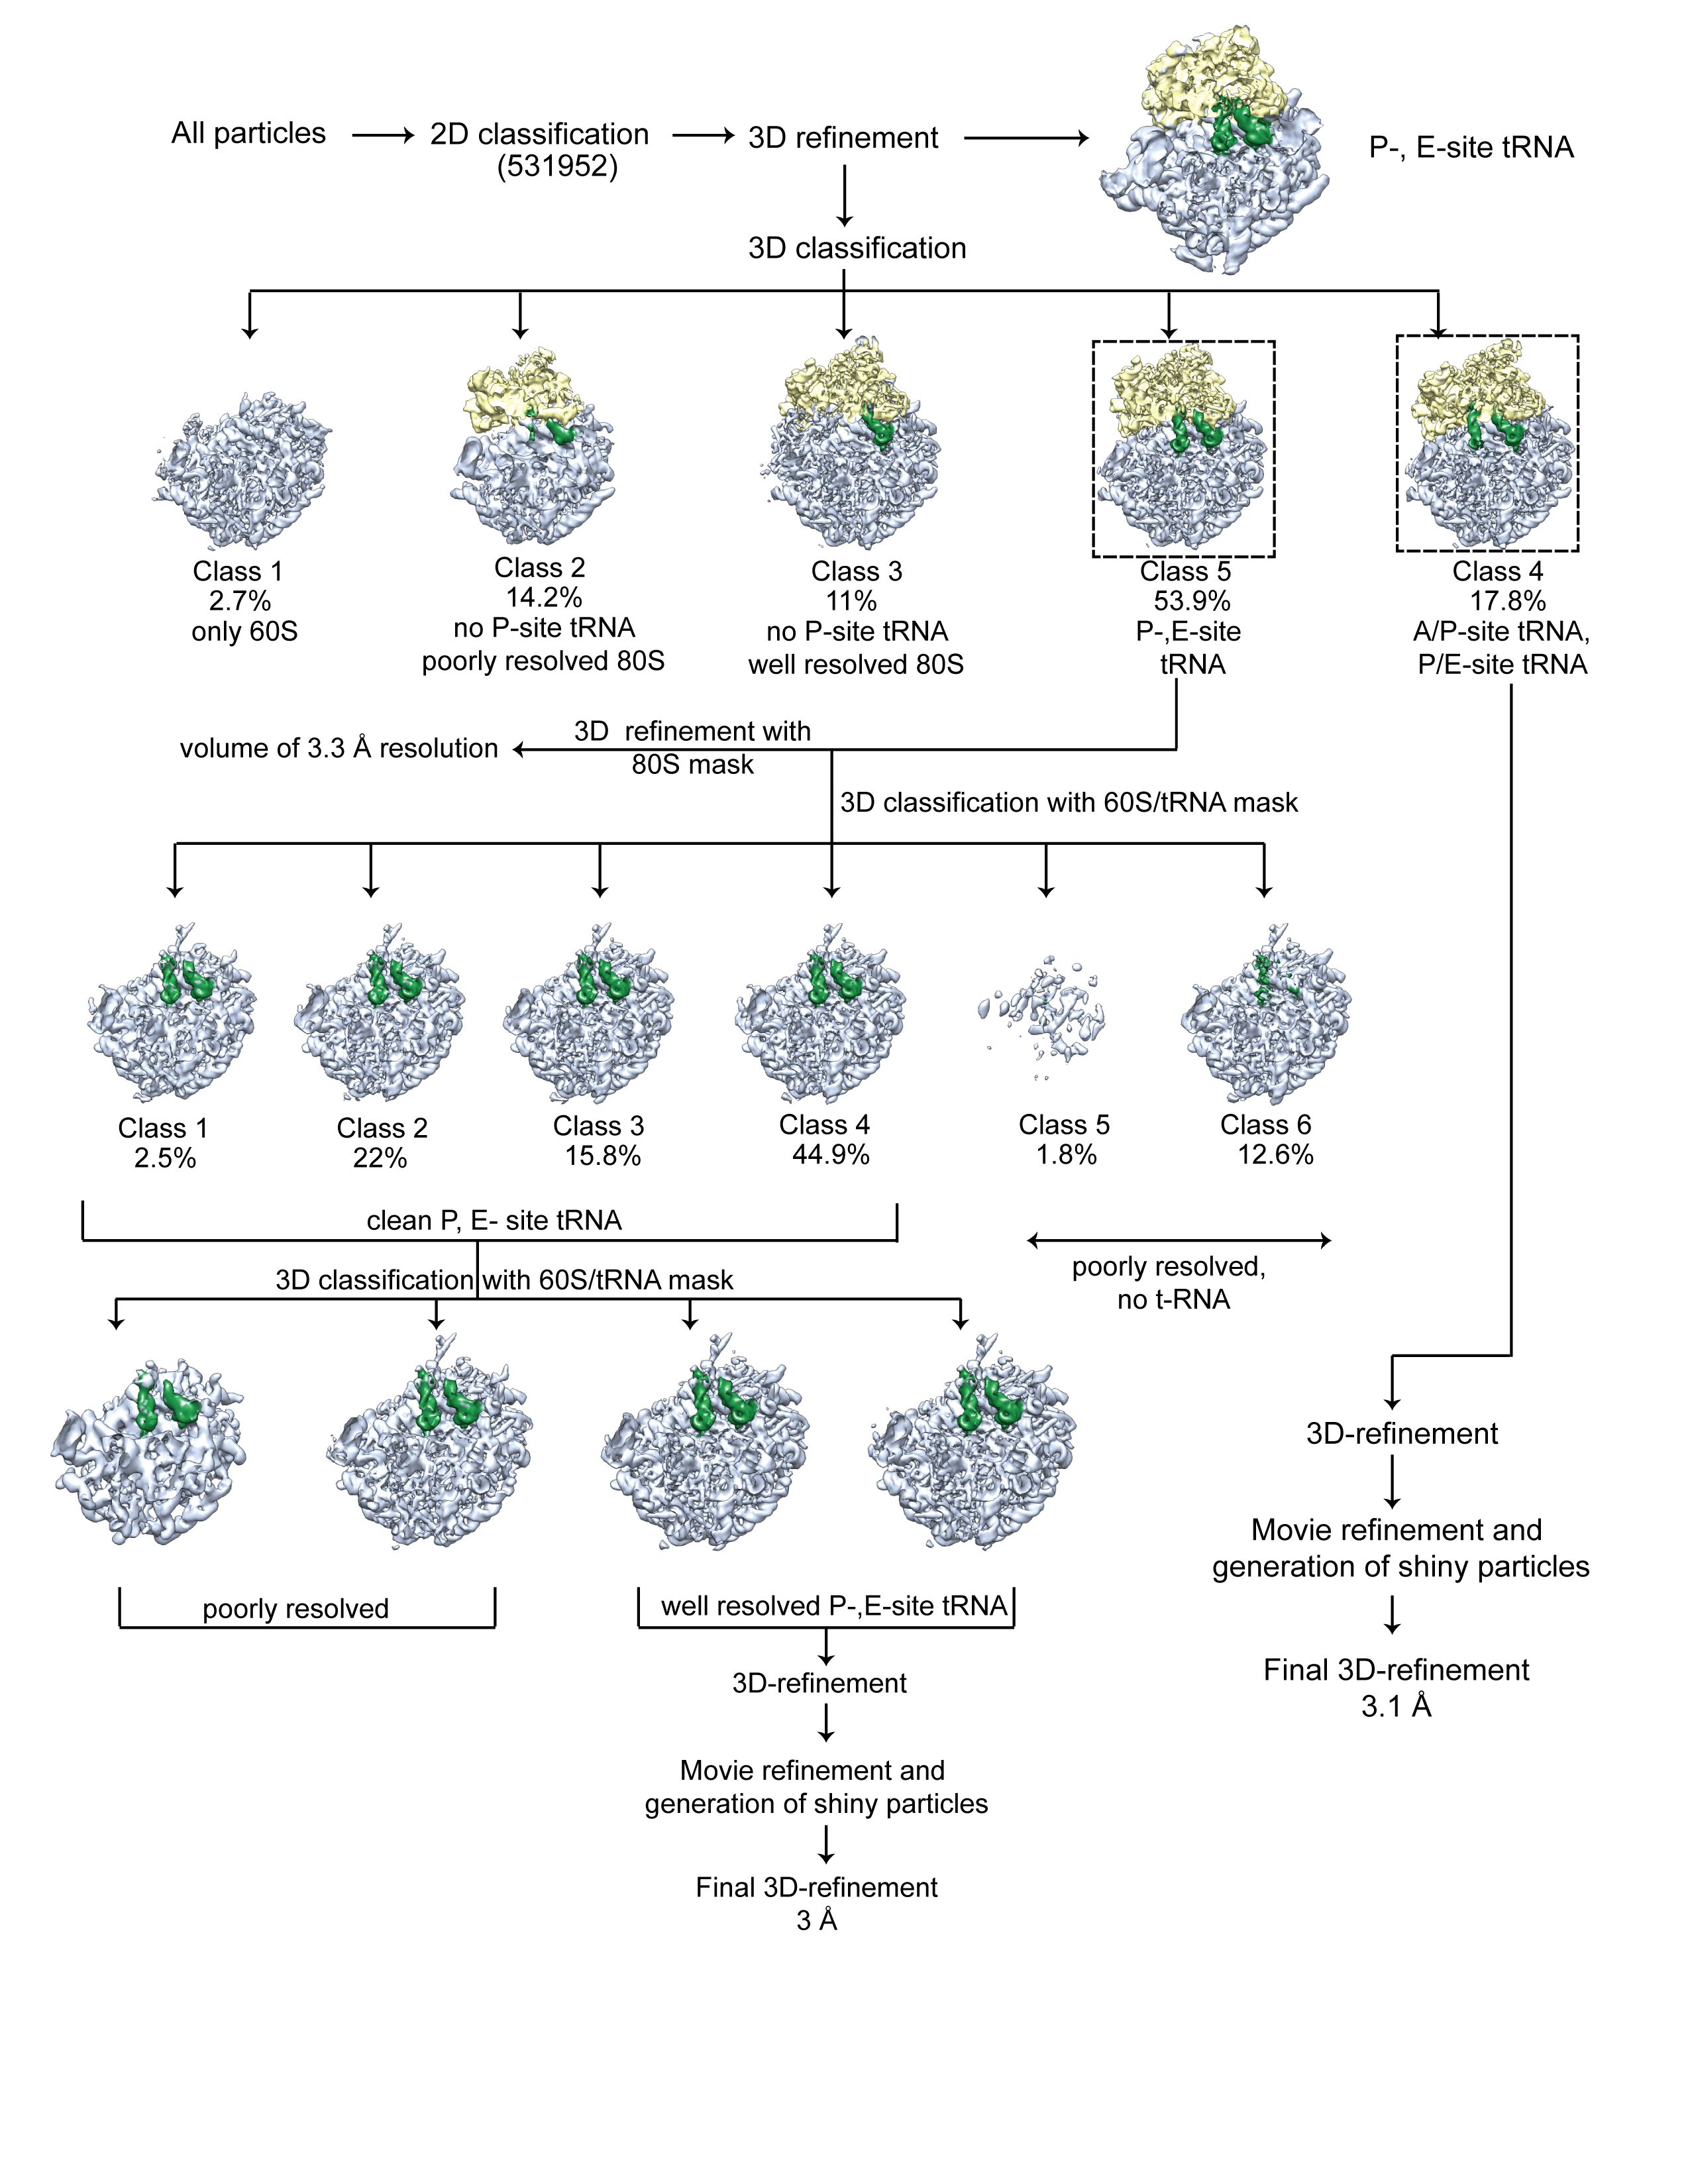
**

Supplement: supp [file elife_poa_e46267_Figure_2_figure_supplement_1.docx]

**Figure 2 supplement 3**

**
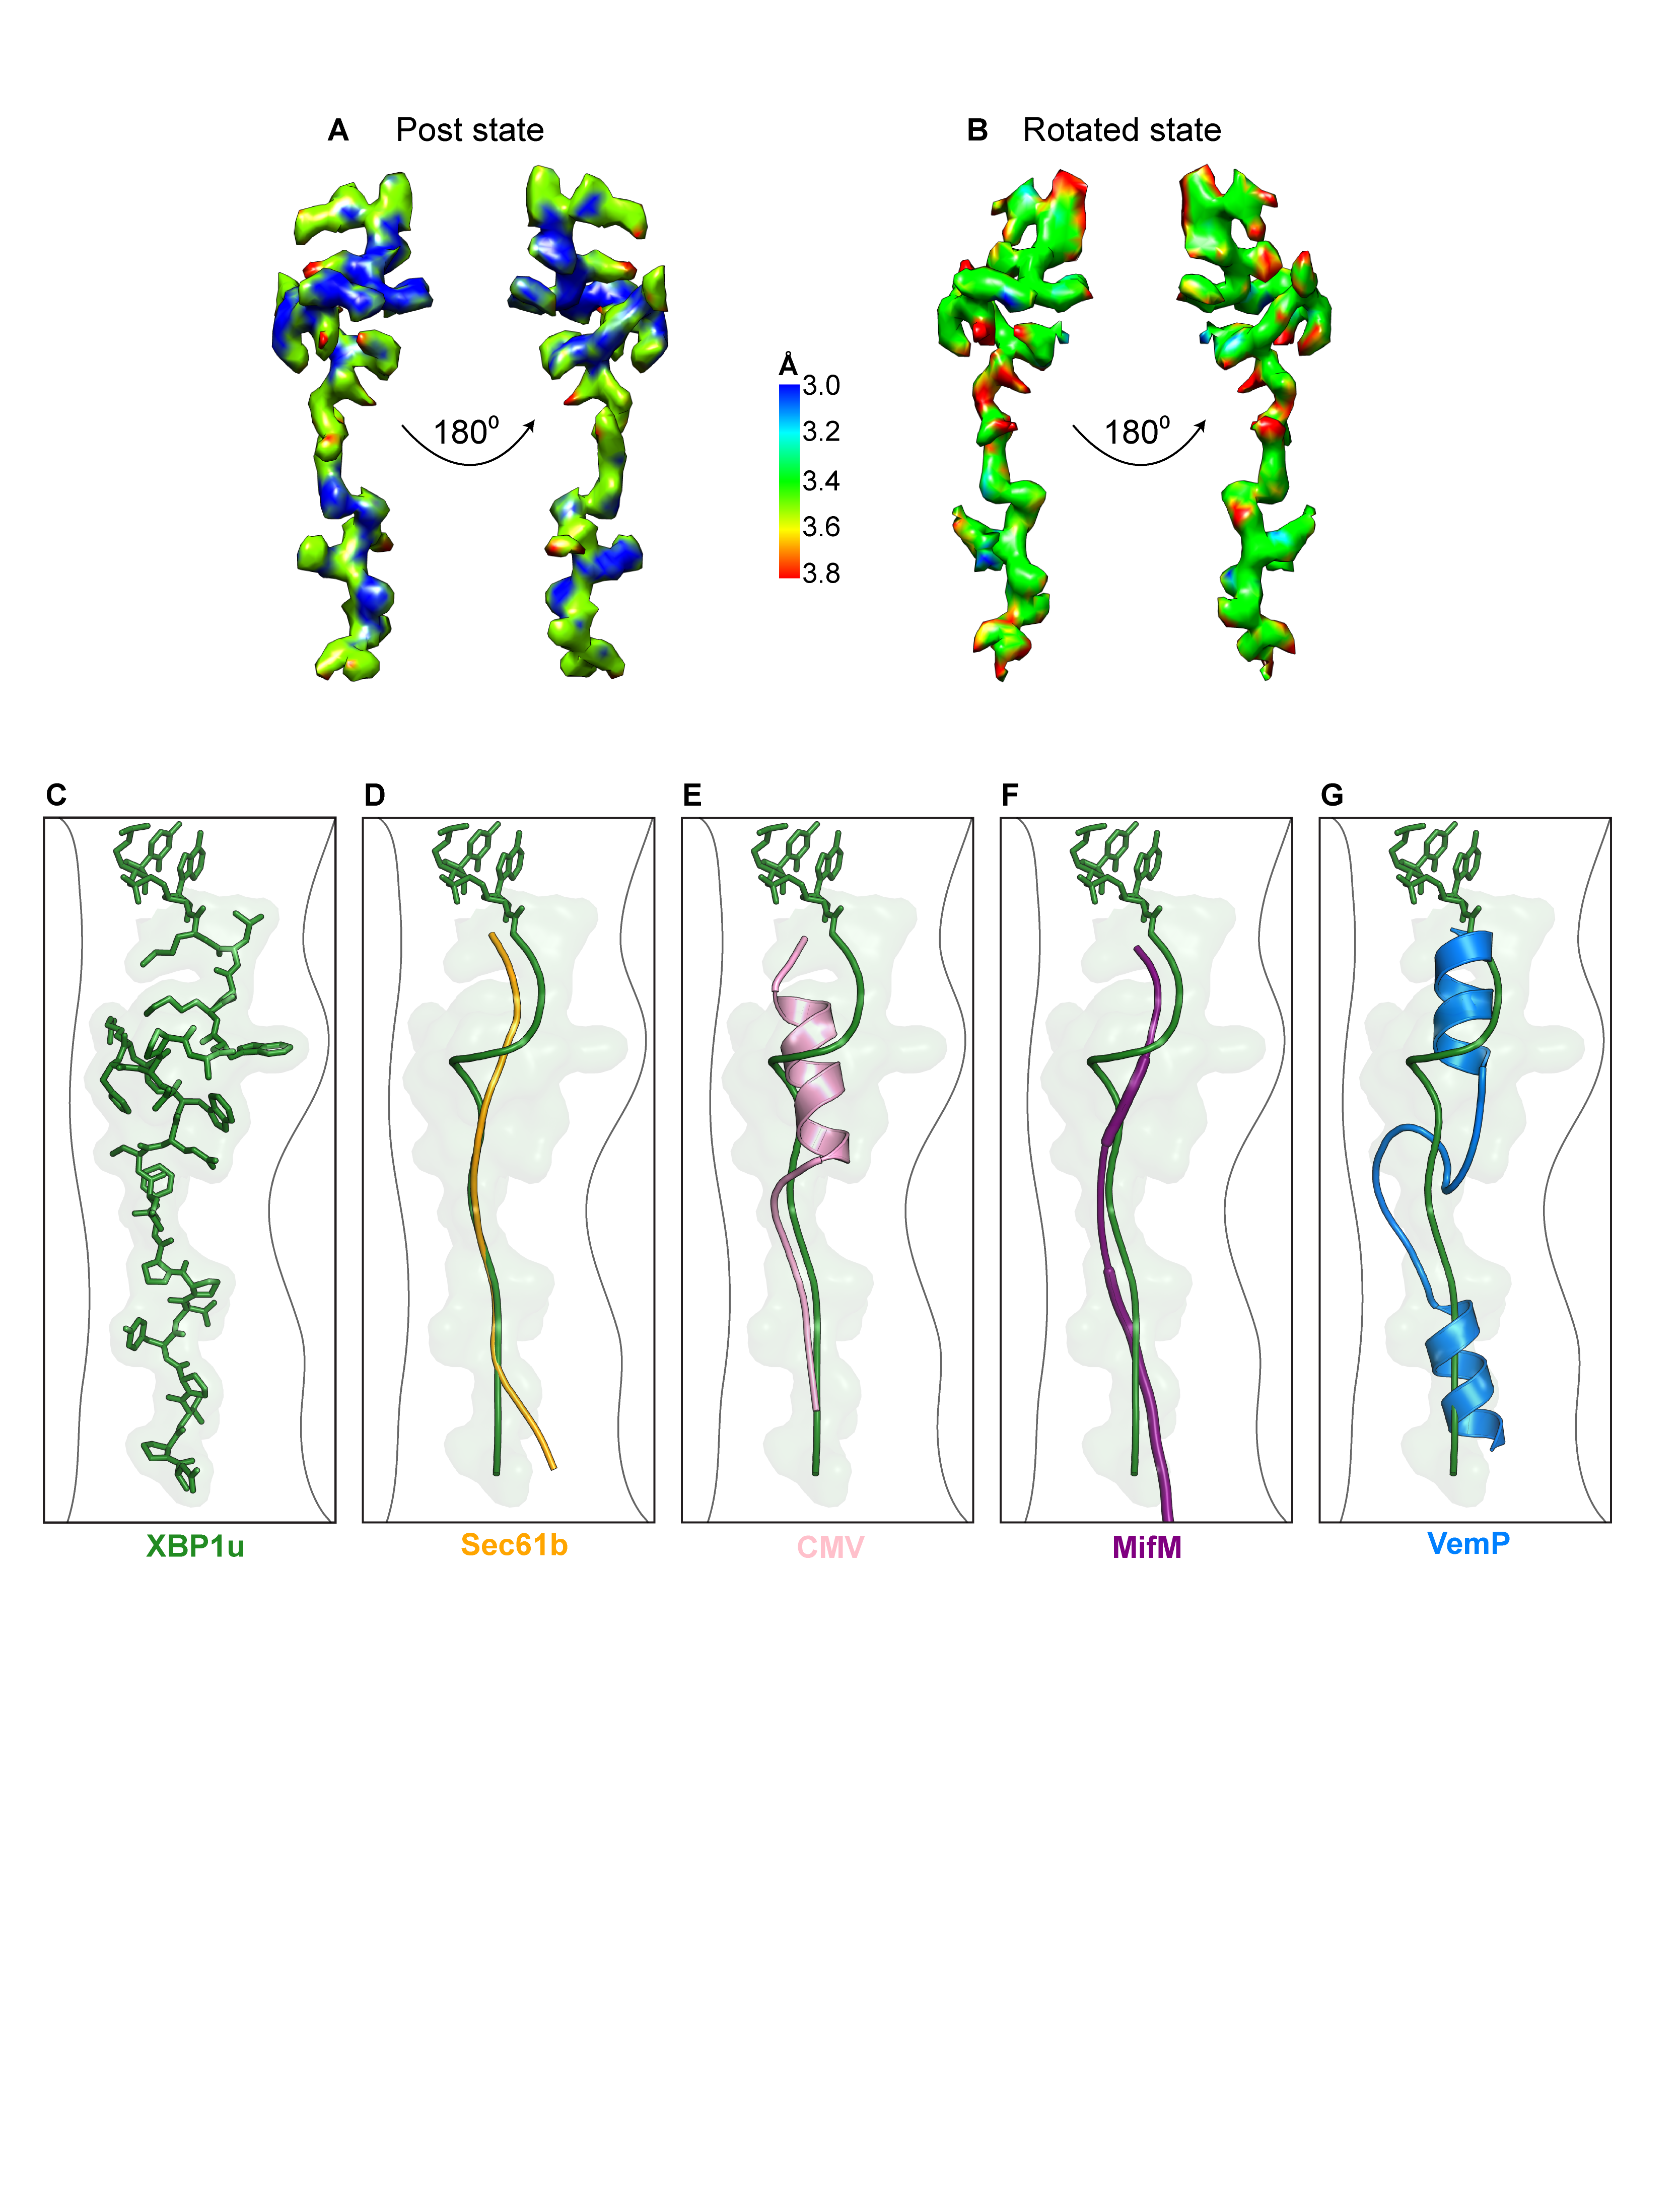
**

Supplement: supp [file elife_poa_e46267_Figure_2_figure_supplement_3.docx]

**Figure 4 supplement 1**

**
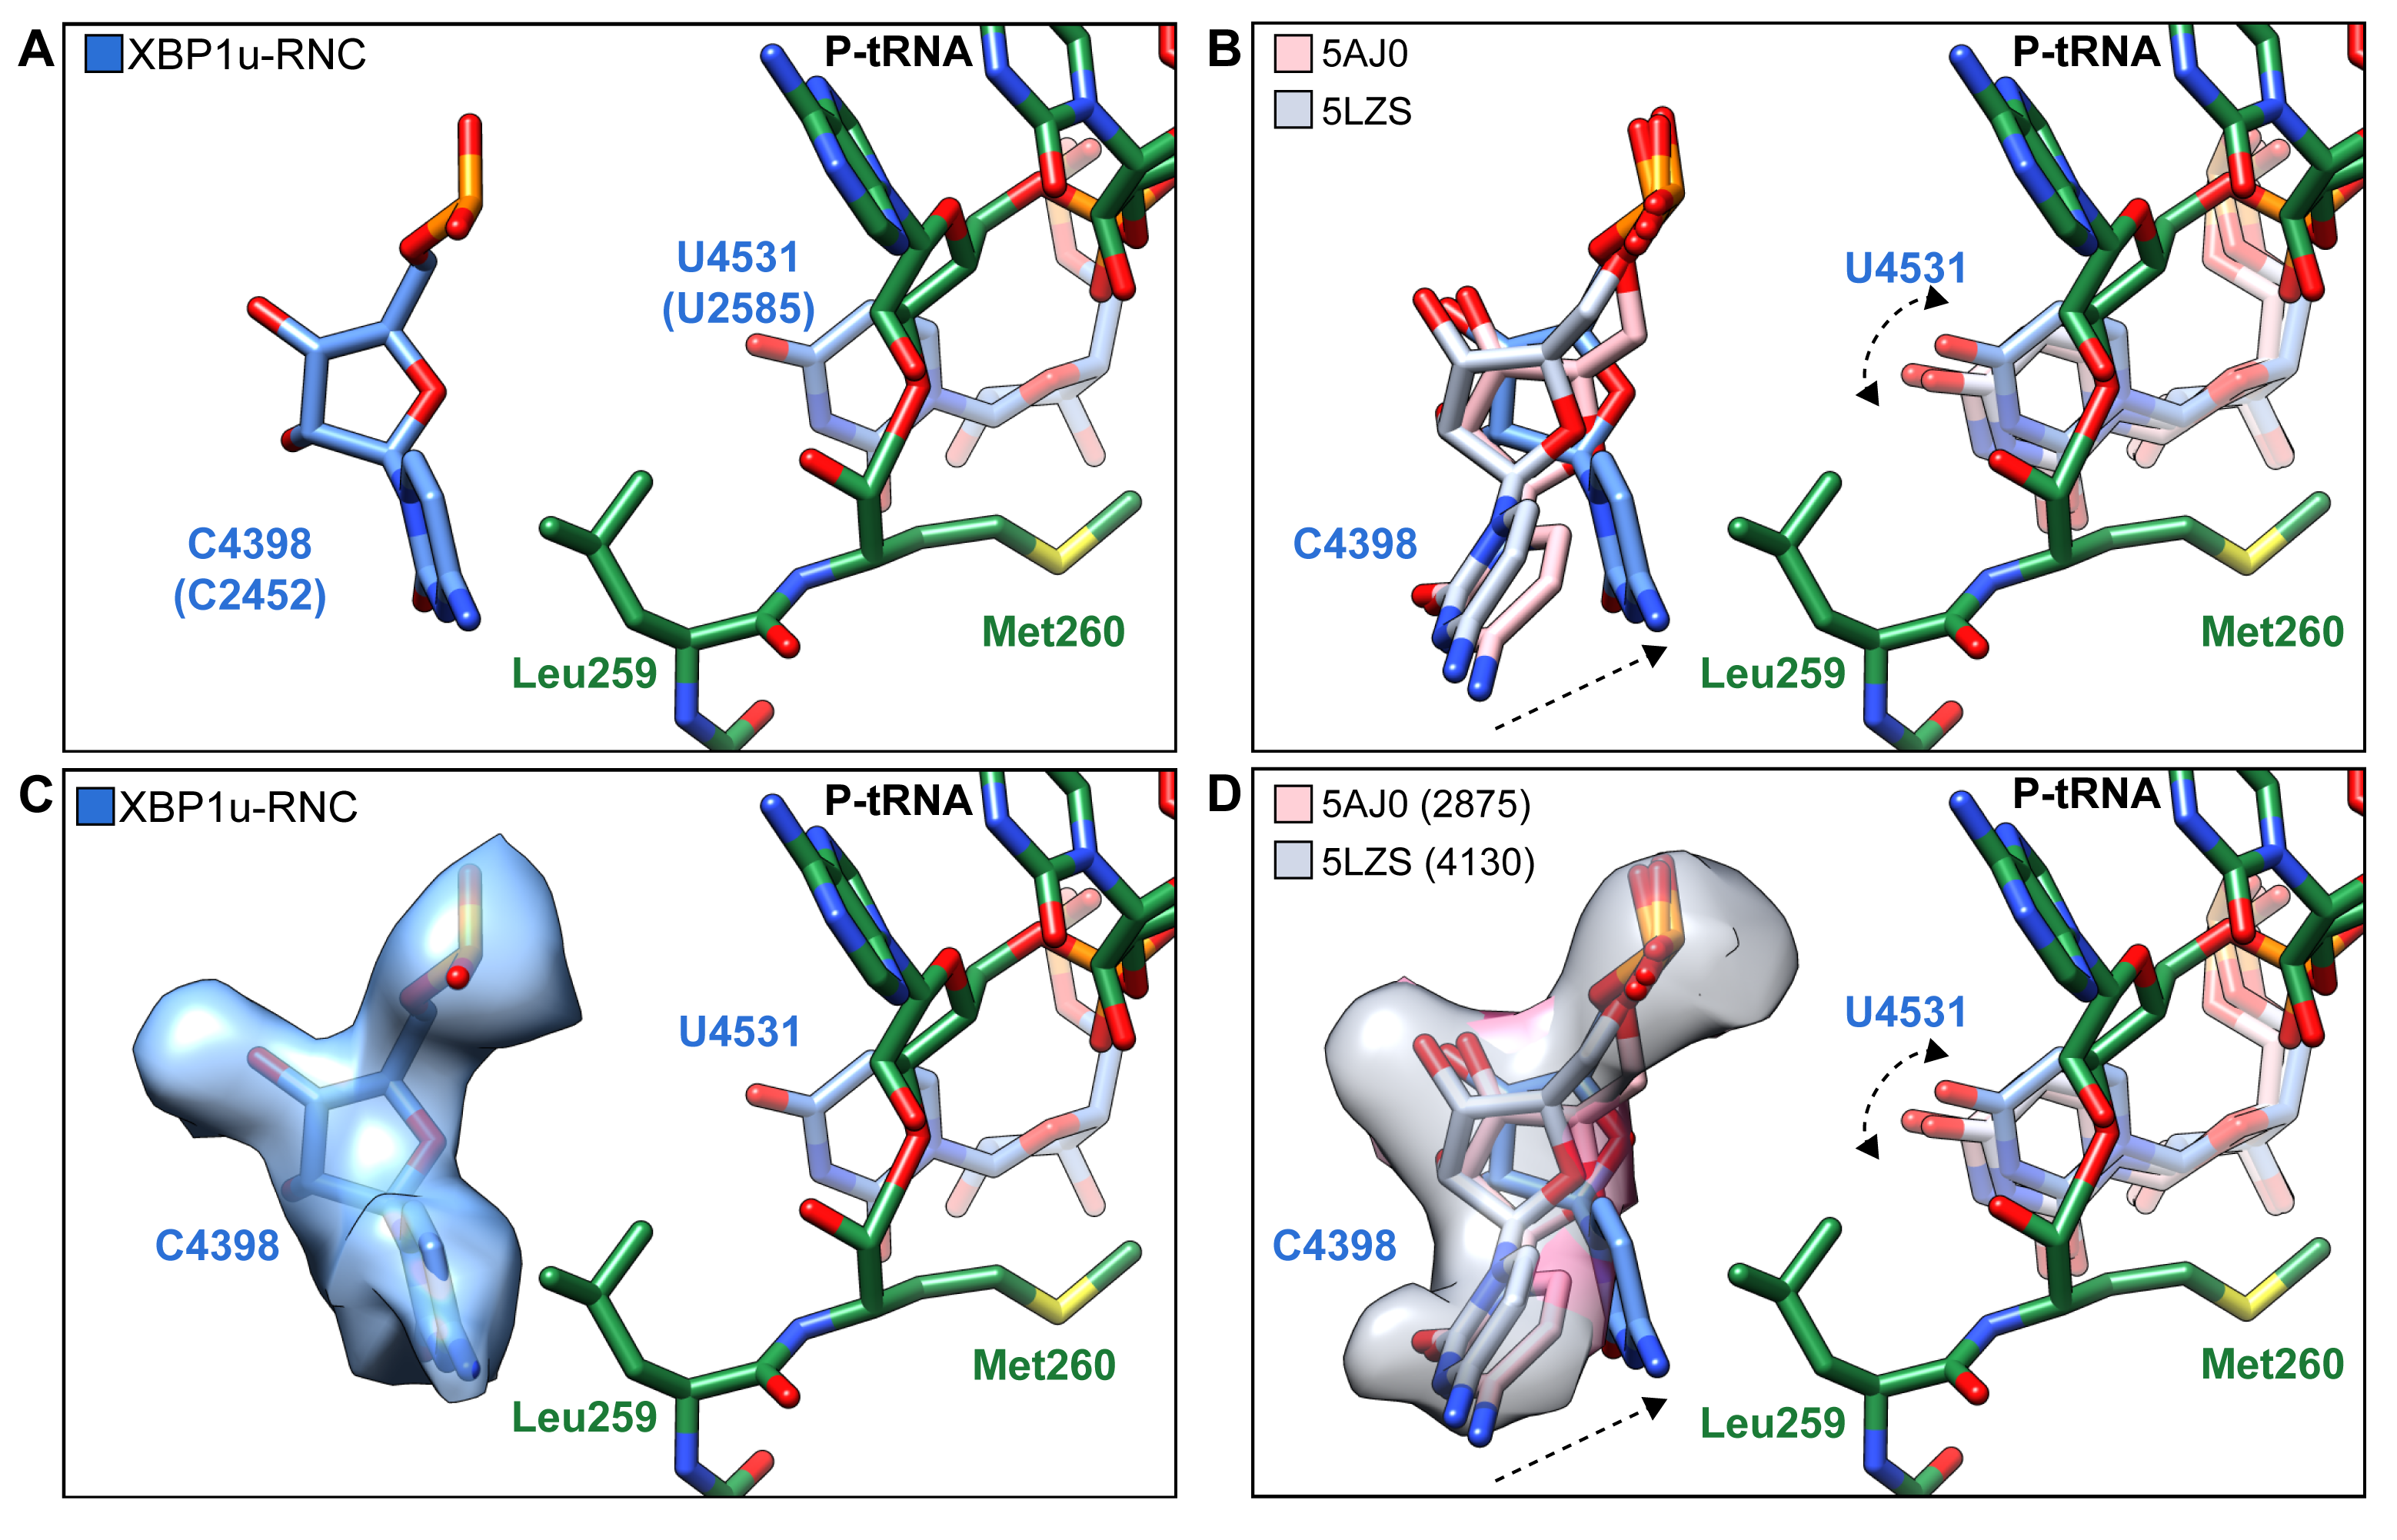
**

Supplement: supp [file elife_poa_e46267_Figure_4_figure_supplement_1.docx]

**Figure 5 supplement 1**

**
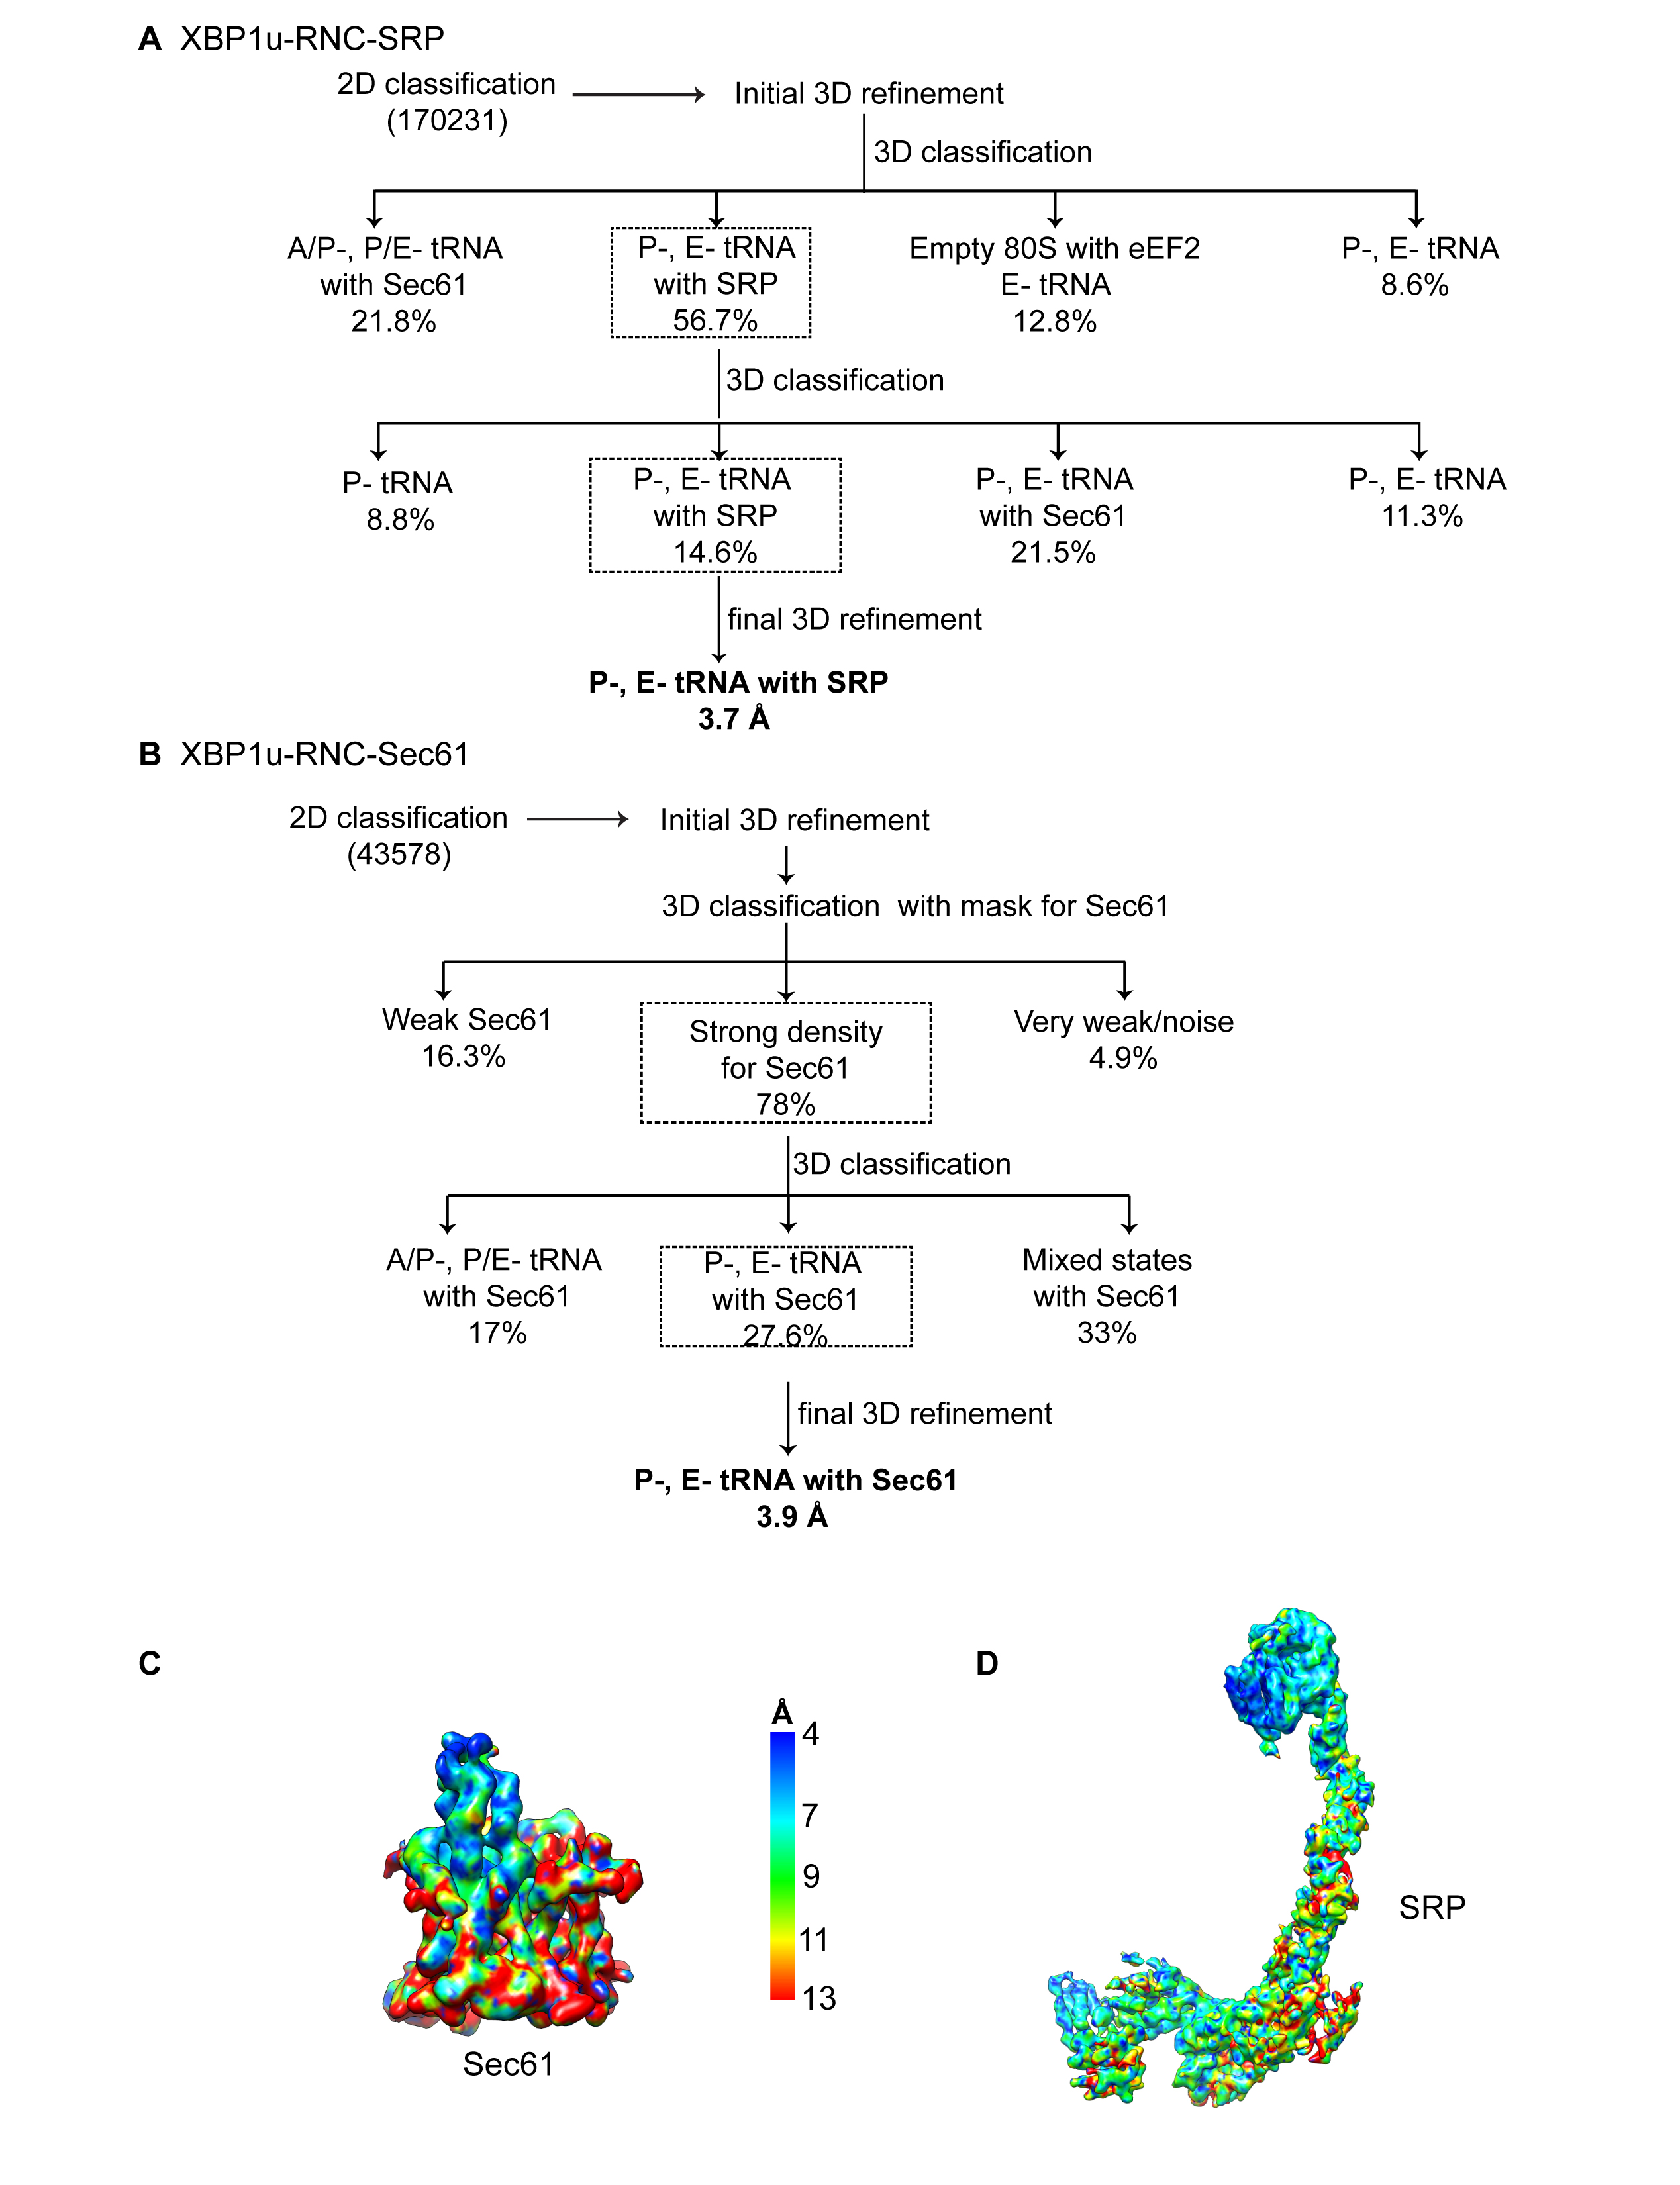
**

Supplement: supp [file elife_poa_e46267_Figure_5_figure_supplement_1.docx]

**
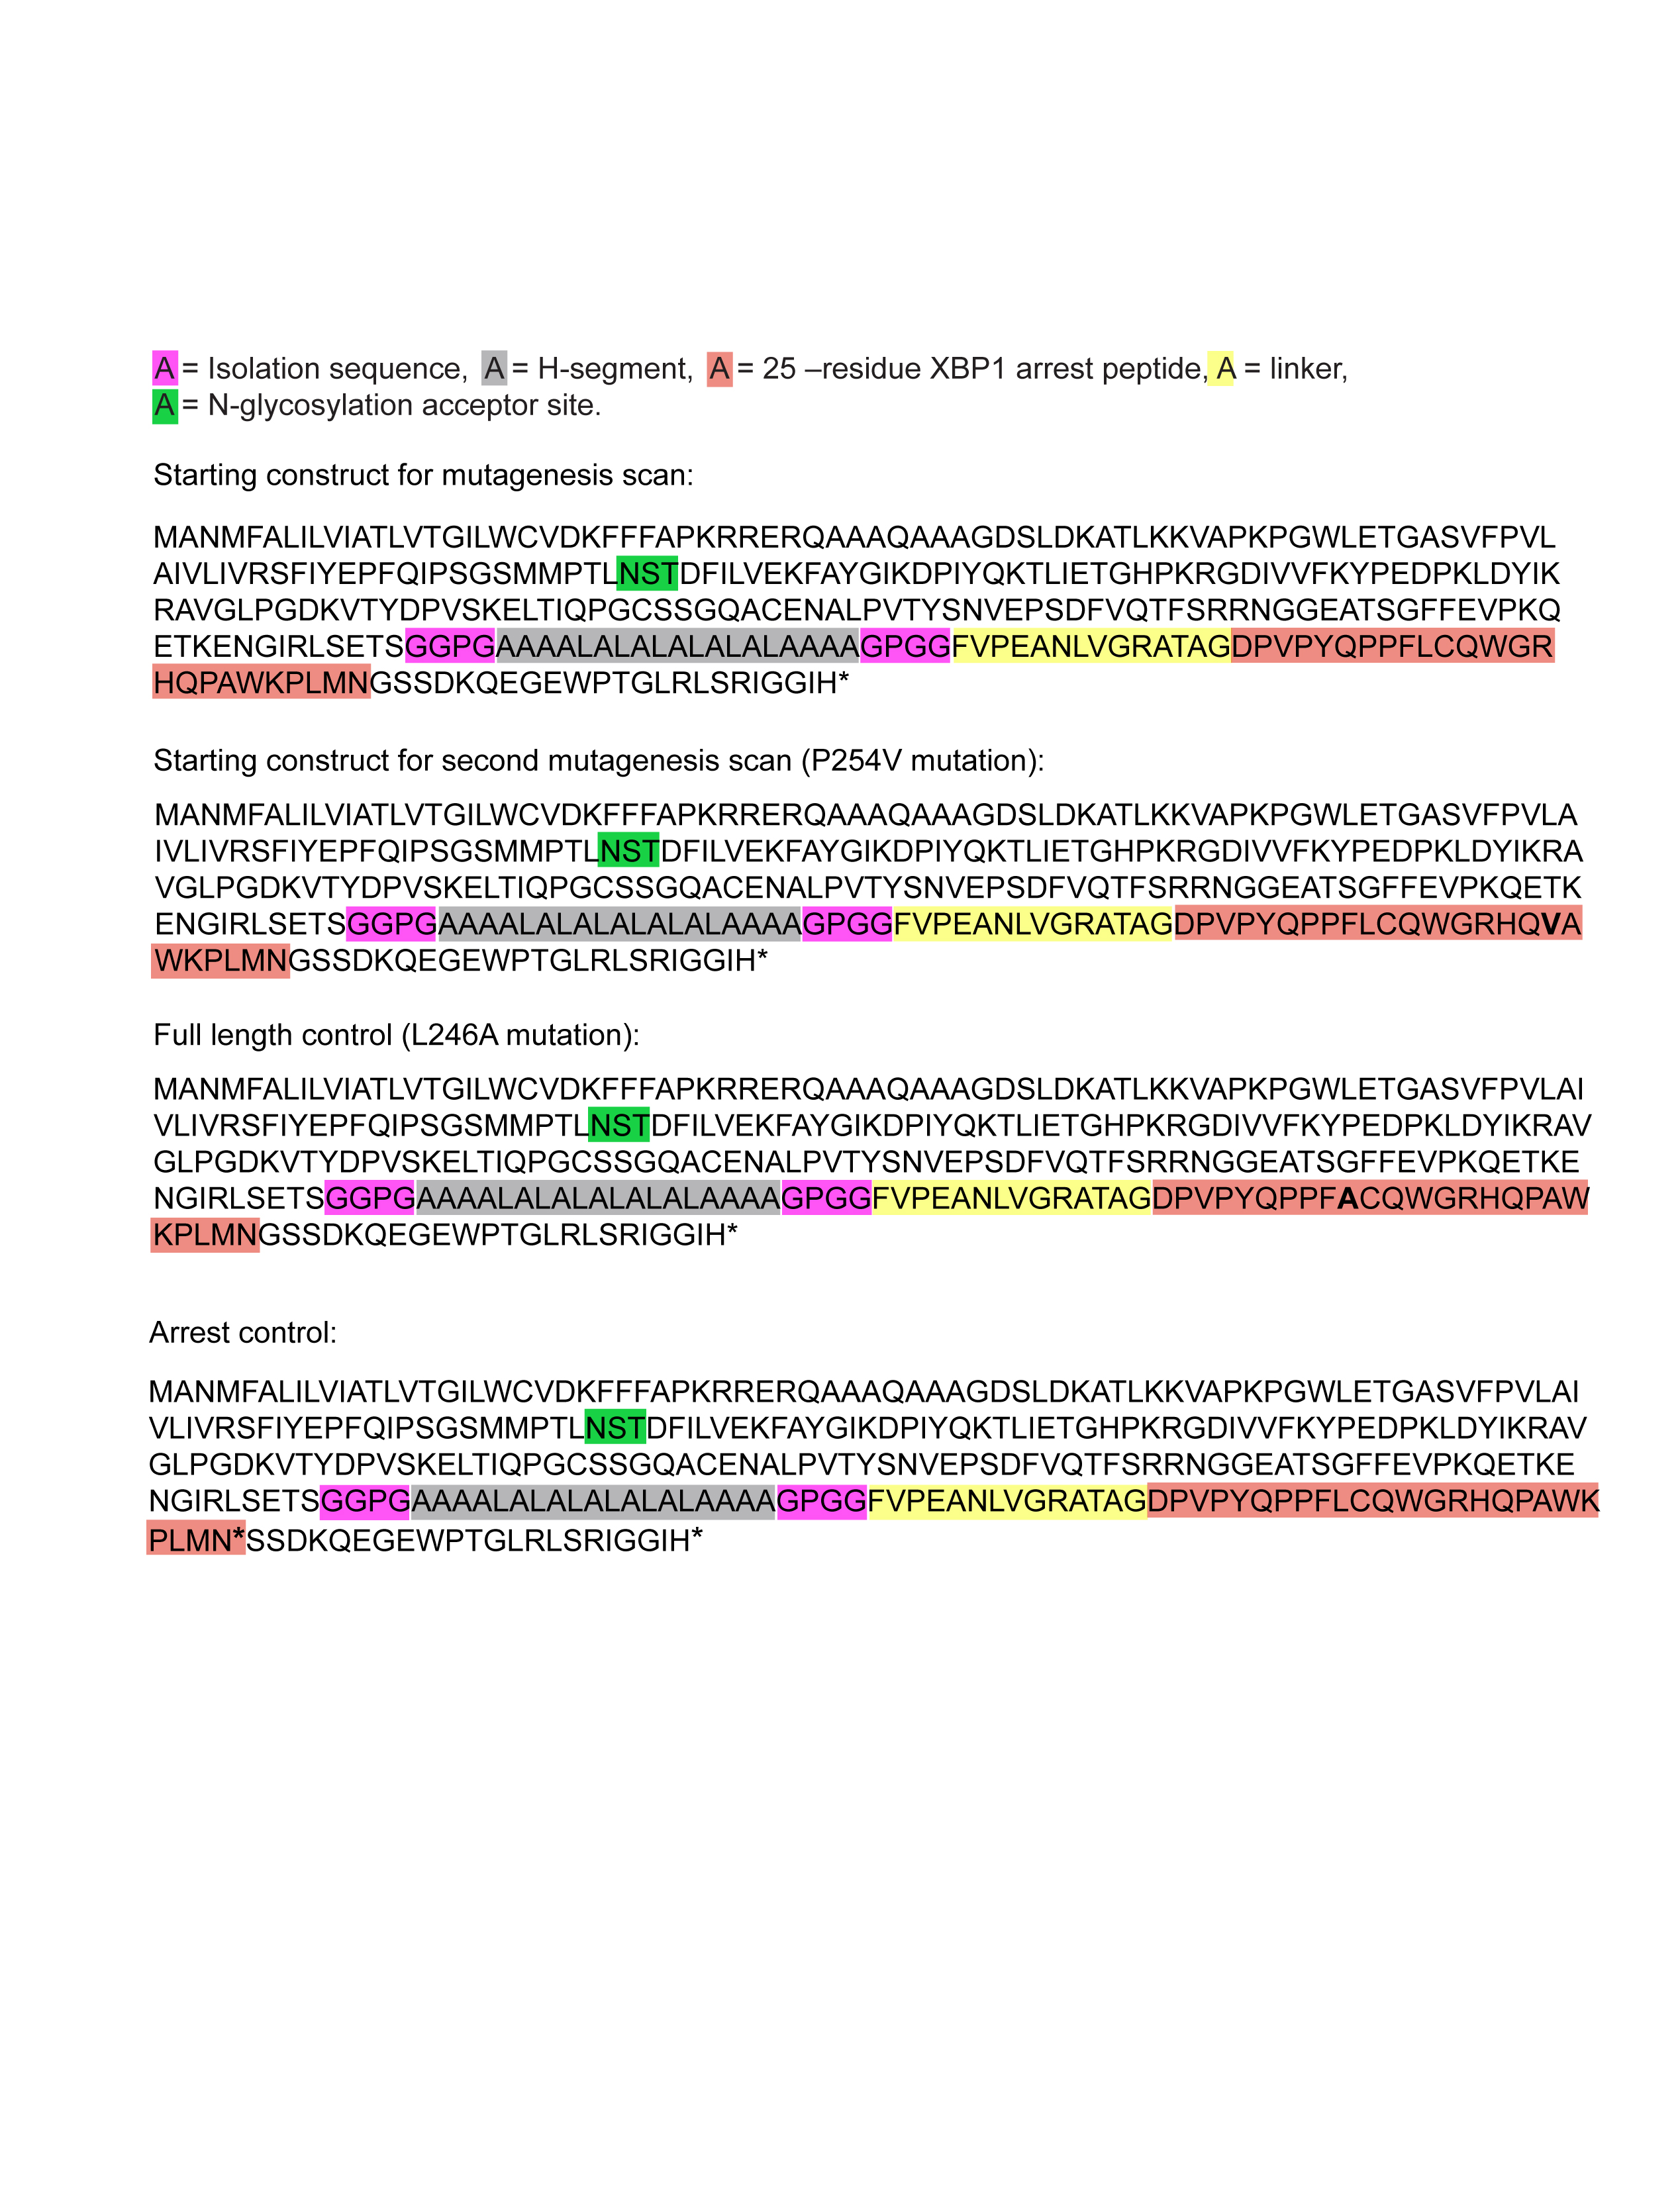
Figure 6 supplement 1**

Supplement: supp [file elife_poa_e46267_Figure_6_figure_supplement_1.docx]

**
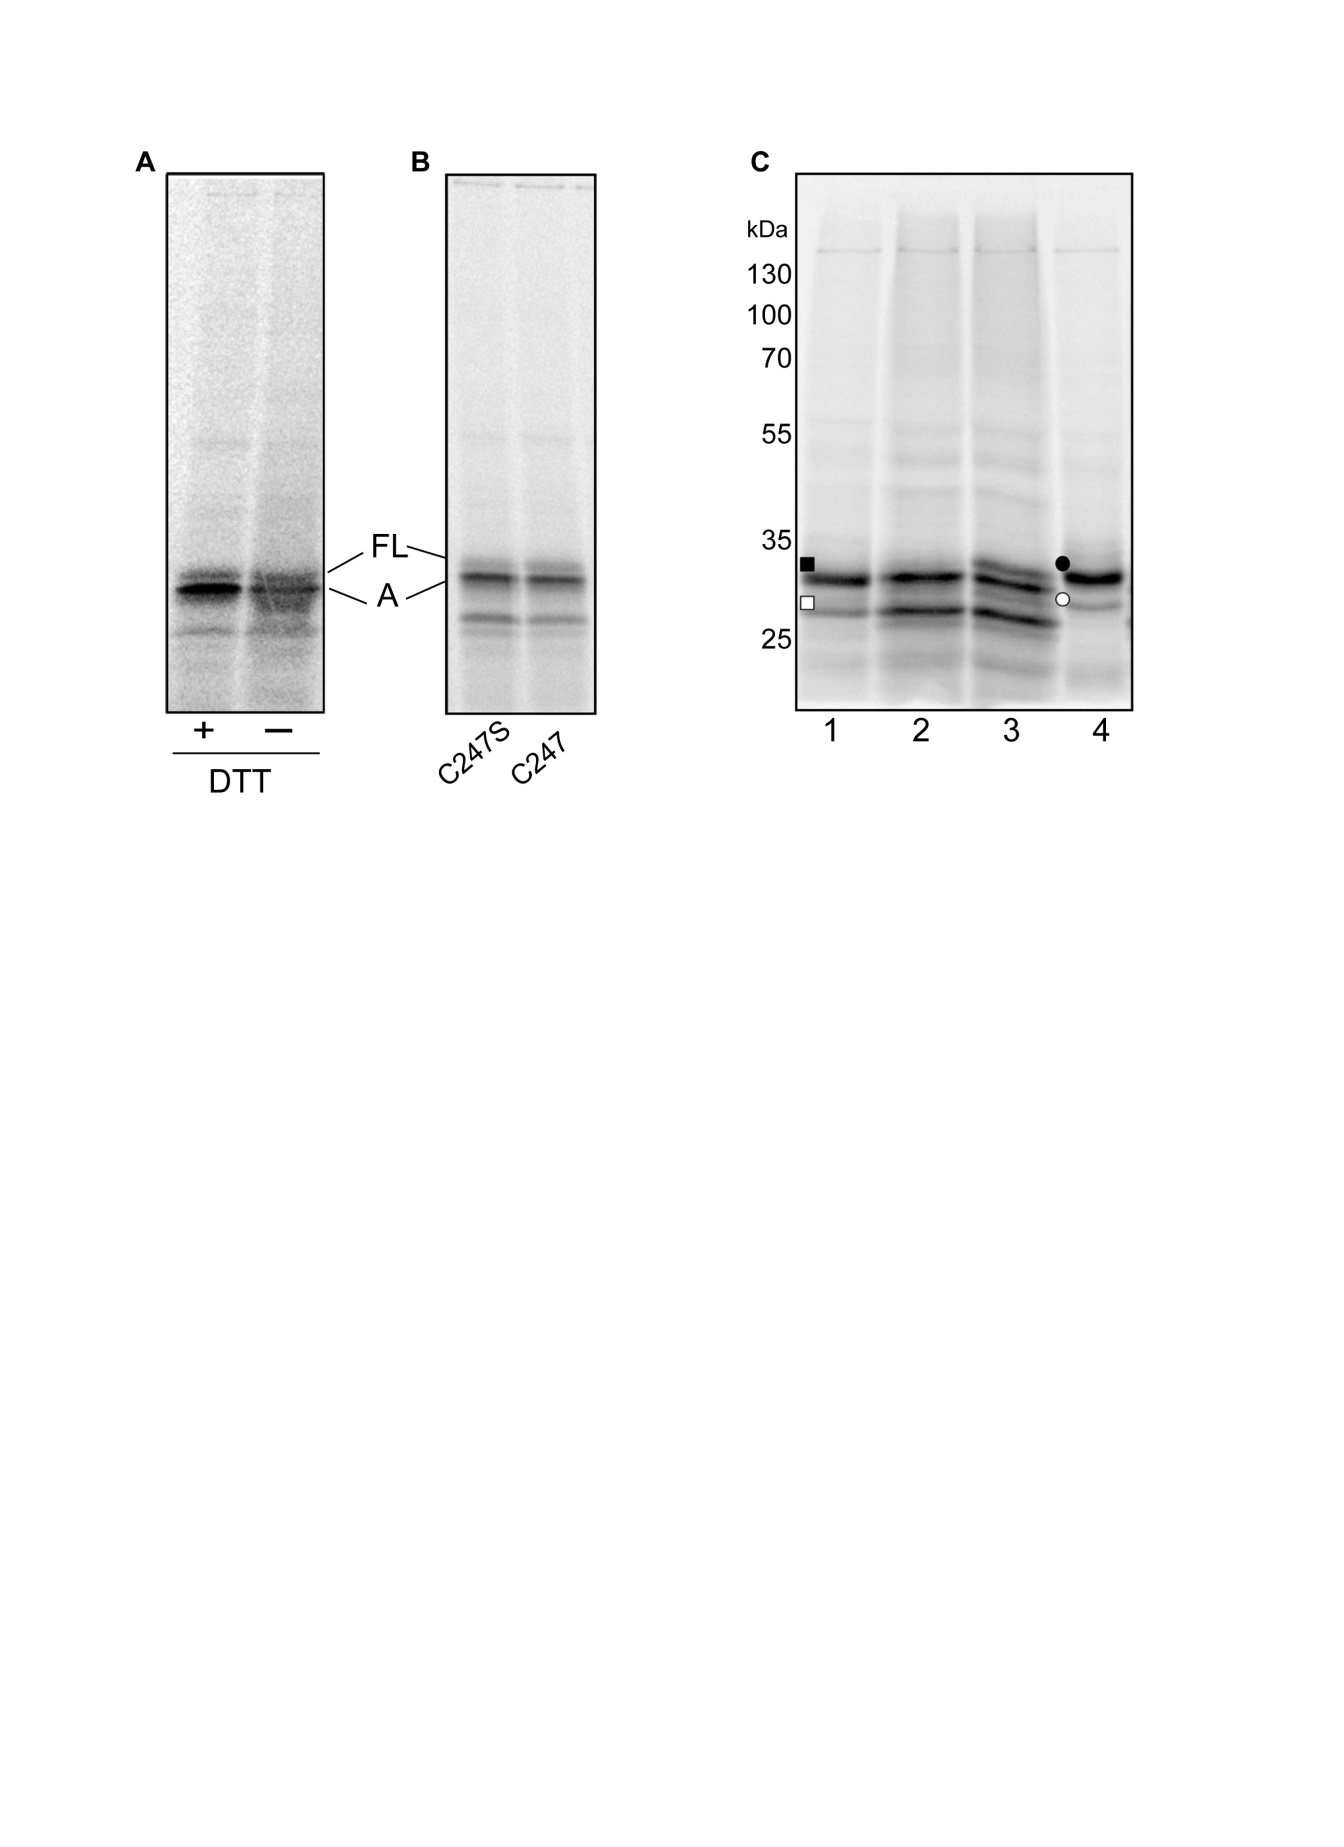
Figure 6 supplement 2**

Supplement: supp [file elife_poa_e46267_Figure_6_figure_supplement_2.docx]
